# Supplementary material for: Comparison of the effects of monounsaturated fatty acids and polyunsaturated fatty acids on the lipotoxicity of islets
Source: PubMed Central journal article supplement (PMC10945794; doi:10.3389/fendo.2024.1368853), 2024-03-04

**Figure S1**

**Low-dose unsaturated fatty acid diet intervention experiment**

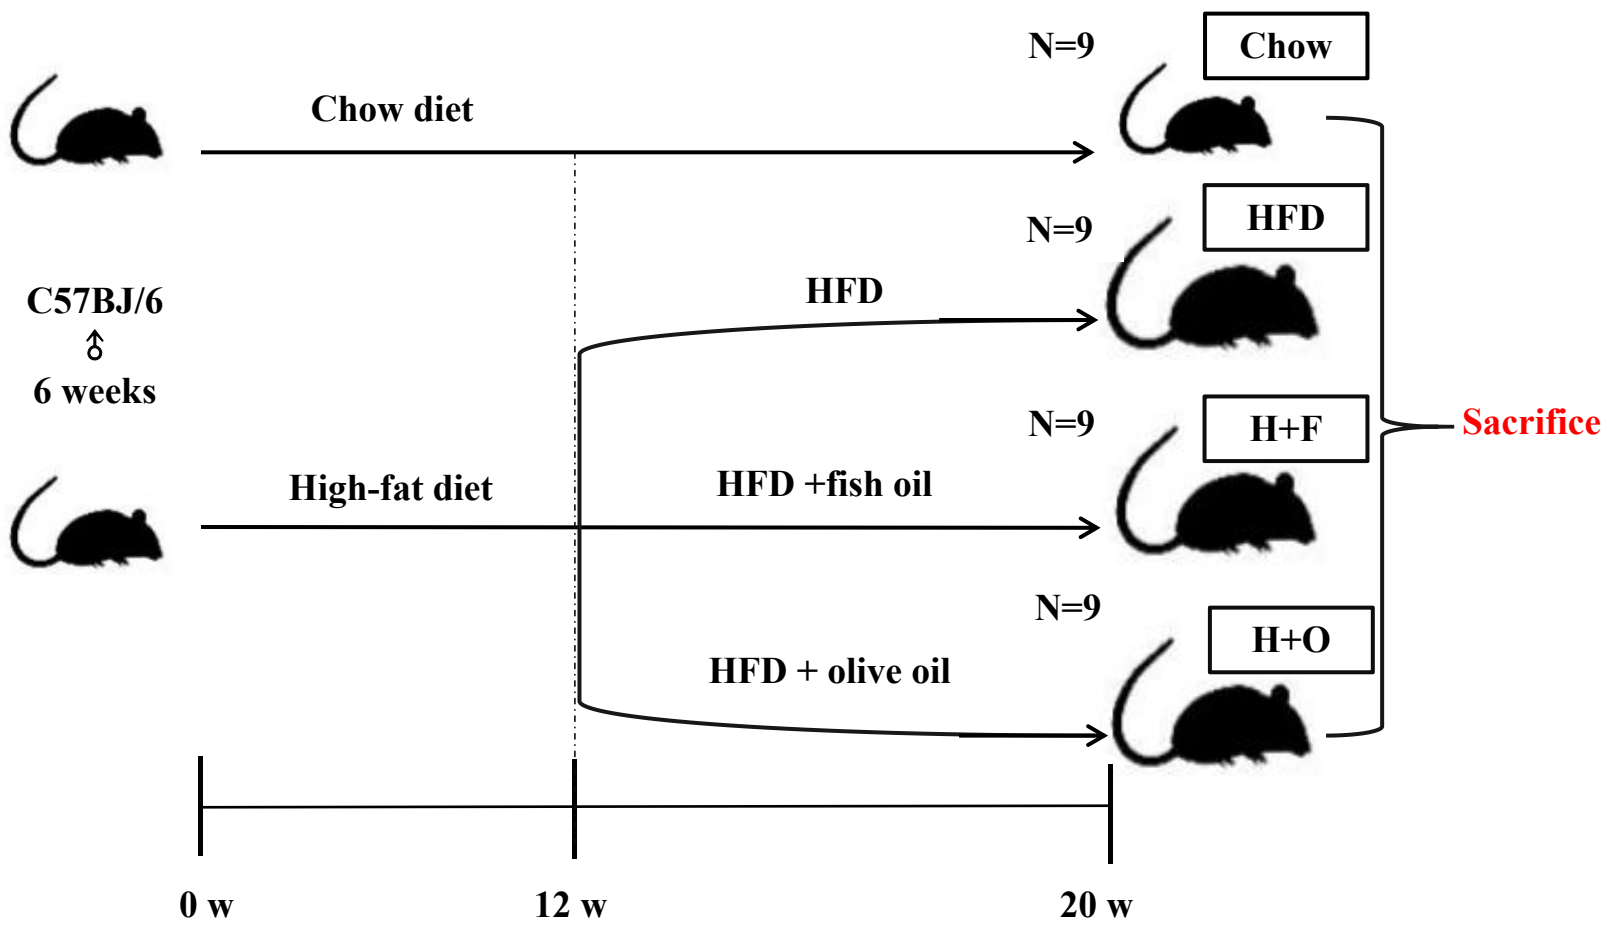

**Figure S2**

**High-dose unsaturated fatty acid diet intervention experiment**

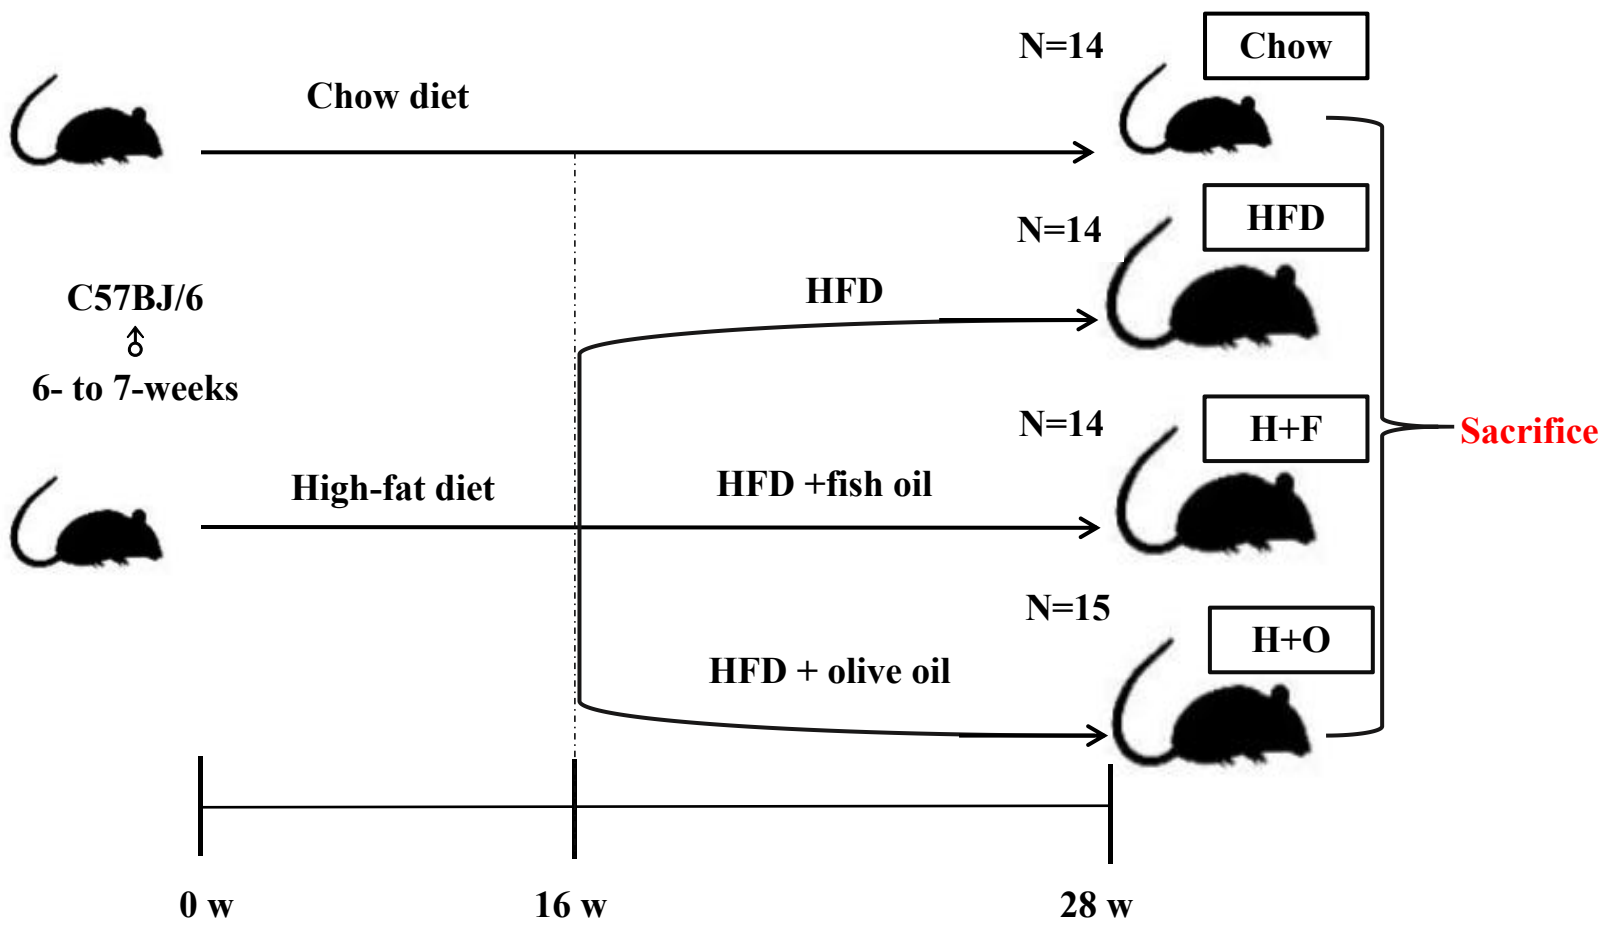

**Figure S3**

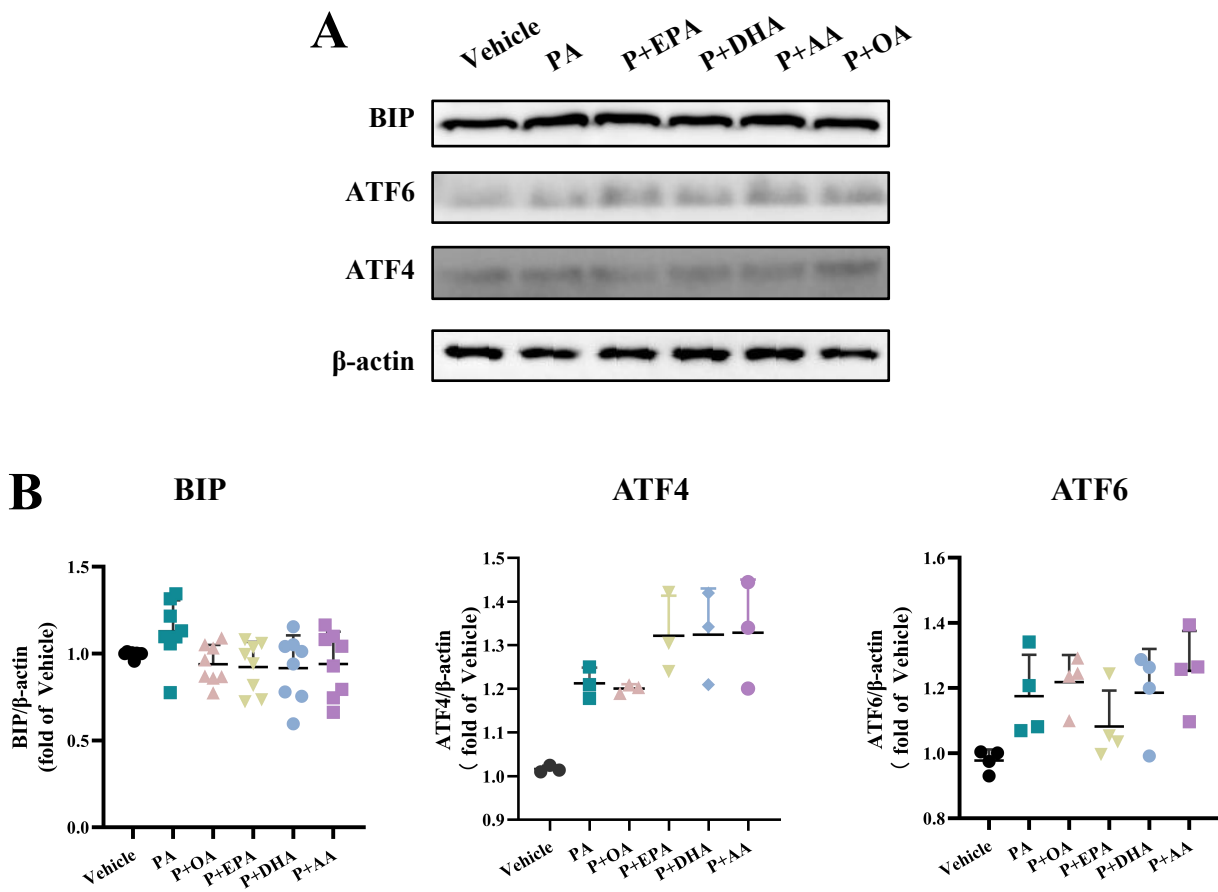

Figure S3. MUFAs/PUFAs ameliorate PA-induced ER stress and the expressions of inflammatory genes.

(A) The expression of ER stress markers (BIP, ATF4, and ATF6) were examined using immunoblots. (B) Statistical analysis of protein expression levels in Figure A. Data are expressed as mean  $\pm$  SD, ( $n \geq 3$ ).

Figure S4

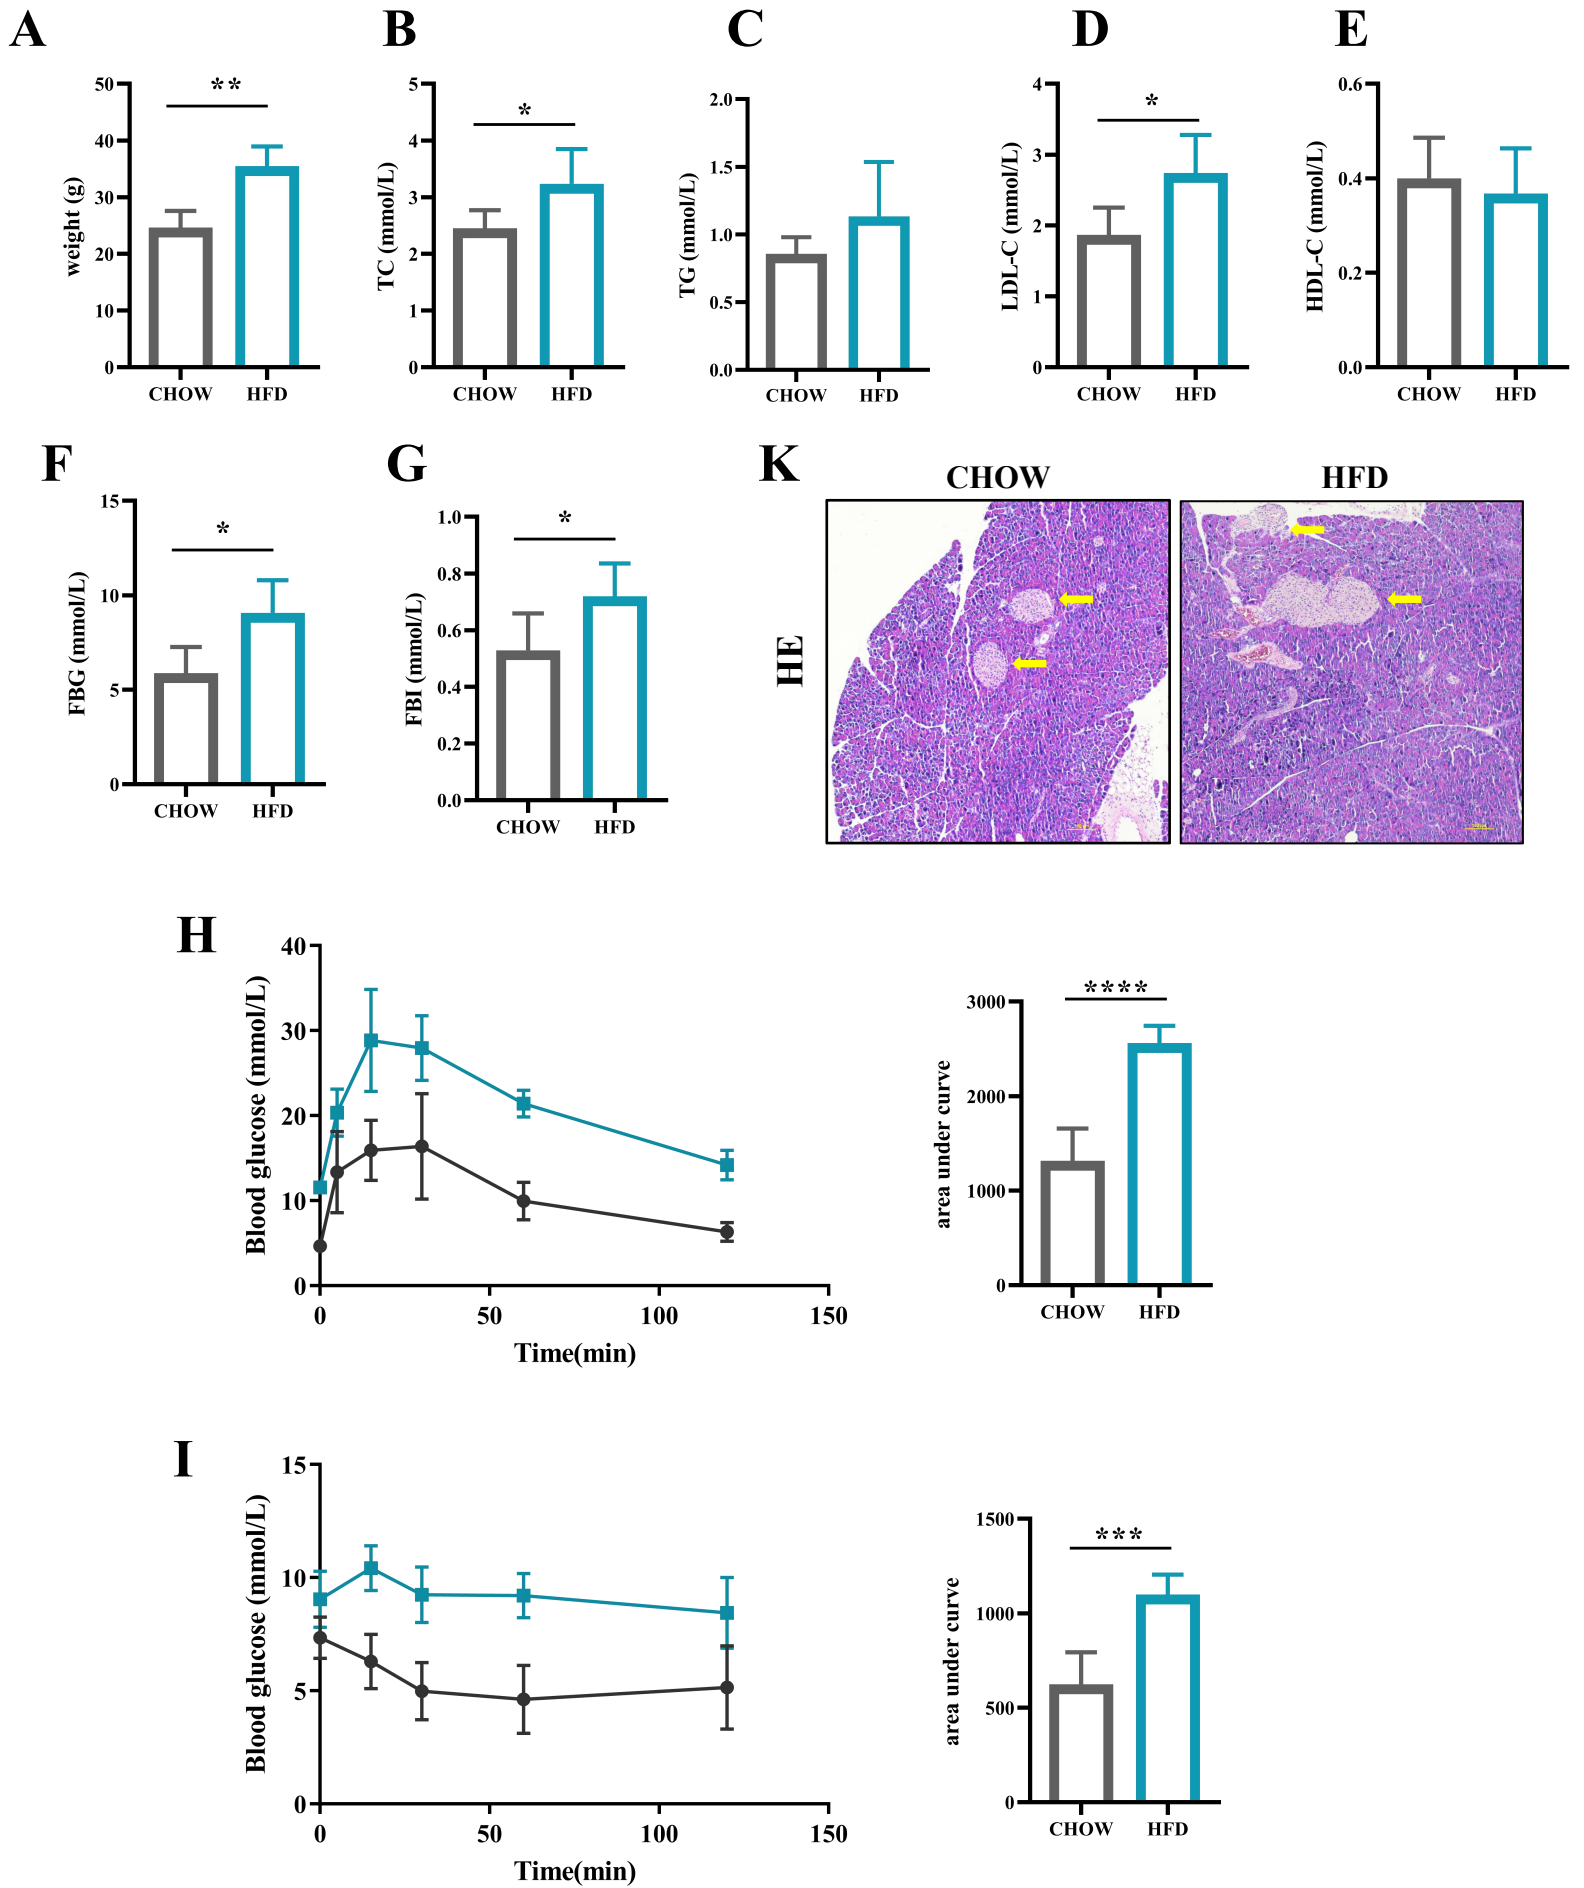

Figure S4. HFD feeding for 12 w induces obesity and insulin resistance in mice. (A) Weight of mice. (B) TC. (C) TG. (D) LDL-C. (E) HDL-C. (F) FBG. (G) FBI. (H) IPGTT. (I) IPITT. (K) HE staining of pancreatic tissue (100X) (The yellow arrows show islets). \* $P < 0.05$ , \*\* $P < 0.01$ , \*\*\* $P < 0.001$ , \*\*\*\* $P < 0.0001$ . Data are expressed as the mean  $\pm$  SD, ( $n \geq 5$ ).

## Figure S5

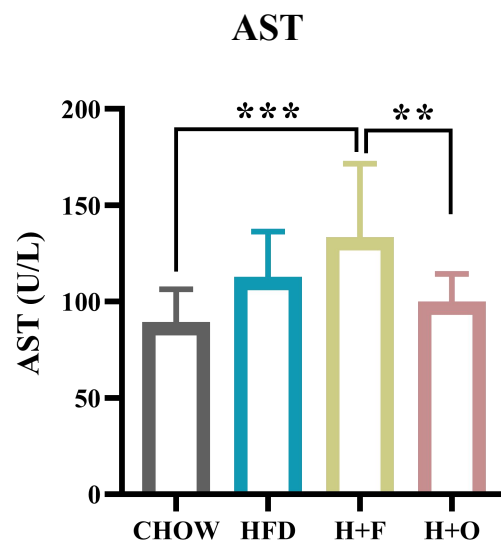

Figure S5. High-dose fish oil diets significantly increased AST levels in obese mice. (A) AST. \*\* $P < 0.01$ , \*\*\* $P < 0.001$ . Data are expressed as the mean  $\pm$  SD, ( $n \geq 5$ ).

### The details of the antibodies

| Antibody                                     | Manufacturer        | Catalog:  | Host species | Dilutions | Mol.Wt.: |
|----------------------------------------------|---------------------|-----------|--------------|-----------|----------|
| Anti-Cleaved caspase-3 antibody              | CST                 | 9664S     | rabiit       | 1:500     | 17       |
| Anti-BAX antibody                            | CST                 | 2772S     | rabiit       | 1:500     | 20       |
| anti-BCL-2 antibody                          | Abcam               | ab196495  | rabiit       | 1:500     | 26       |
| anti-IRE1 $\alpha$ antibody                  | CST                 | 3294S     | rabiit       | 1:400     | 130      |
| anti-CHOP antibody                           | Affinity bioscience | DF6025    | rabiit       | 1:500     | 19       |
| Anti-actin antibody                          | ABclonal            | AC026     | rabiit       | 1:50000   | 42       |
| anti-XBP-1 antibody                          | Wanlei              | WL00708   | rabiit       | 1:500     | 29/40    |
| Anti-BIP antibody                            | Absin               | abs130538 | rabiit       | 1:500     | 75       |
| Anti-peif2 $\alpha$ antibody                 | CST                 | 3398S     | rabiit       | 1:500     | 38       |
| anti-ATF4 antibody                           | Huaan               | ET1612-37 | rabiit       | 1:1000    | 55       |
| anti-ATF6 antibody                           | Affinity bioscience | DF6009    | rabiit       | 1:500     | 75       |
| Anti-Insulin antibody                        | Huaan               | Em80714   | mouse        | 1:500     |          |
| anti-glucagon antibody                       | Absin               | abS124780 | rabiit       | 1:200     |          |
| Donkey Anti-Rabbit IgG H&L (DyLight® 550)    | Abcam               | ab96892   | Donkey       | 1:200     |          |
| Donkey Anti-Mouse IgG H&L (Alexa Fluor® 488) | Abcam               | ab150105  | Donkey       | 1:200     |          |
| HRP labelled goat anti-rabbit IgG            | Wanlei              | WLA023    | goat         | 1:4000    |          |

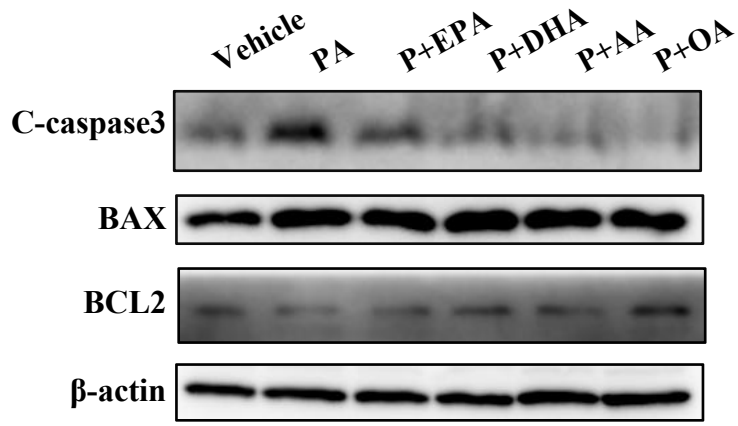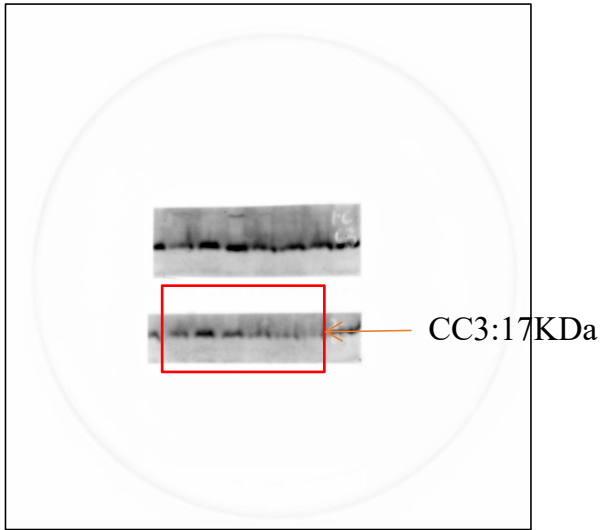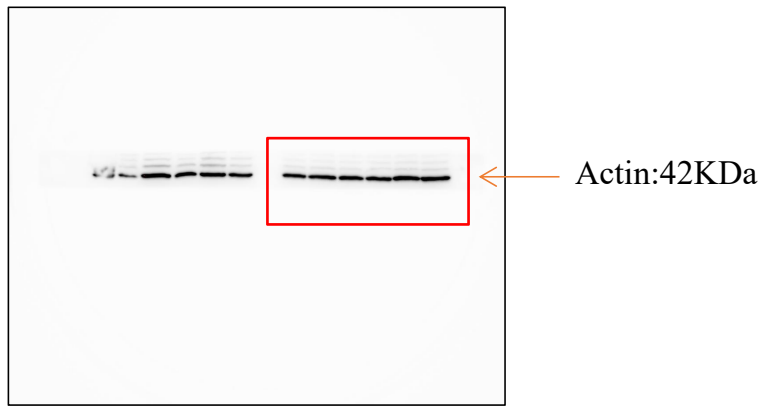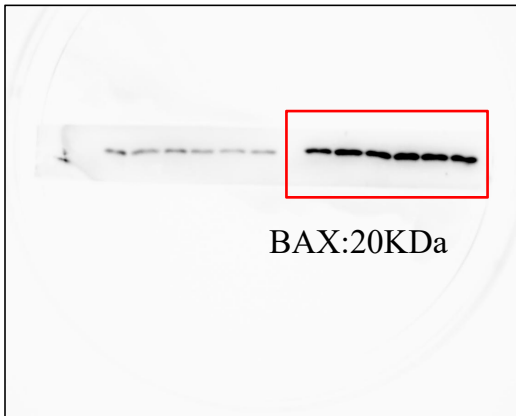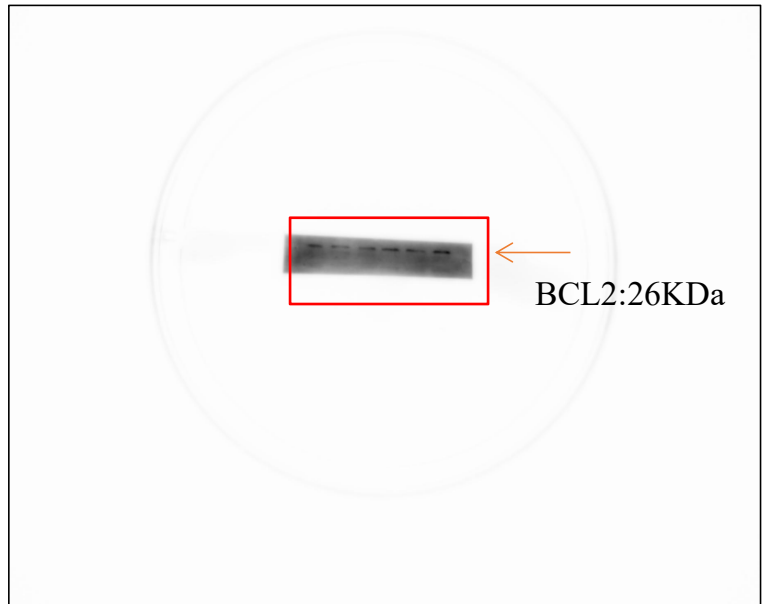

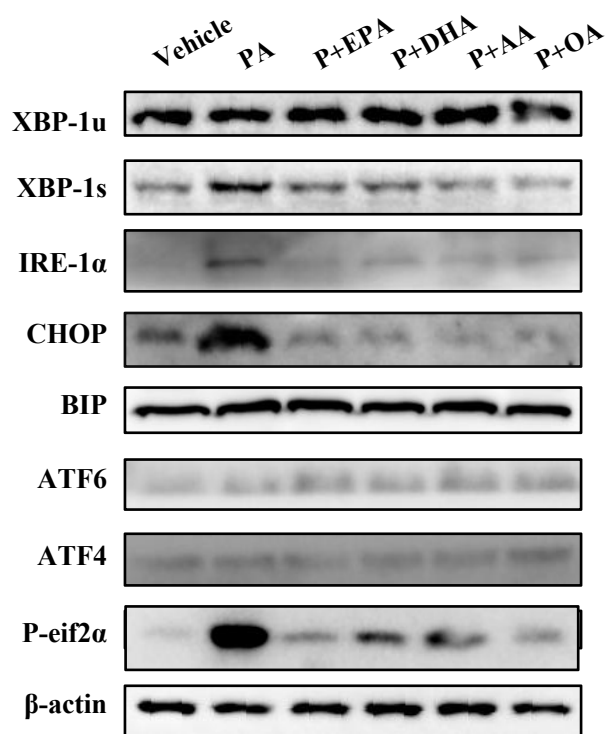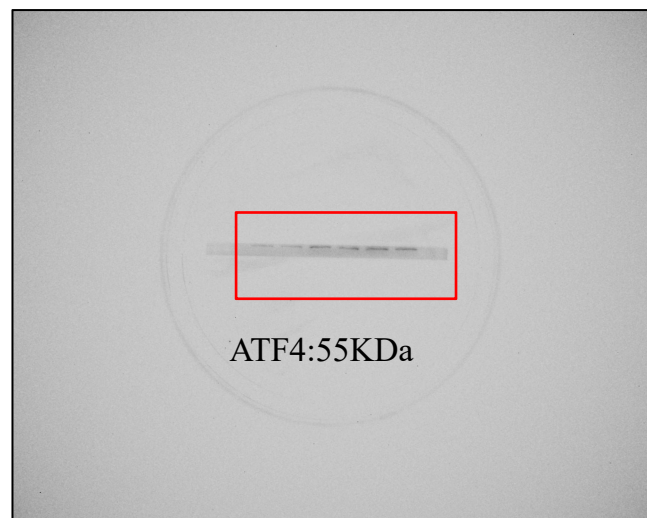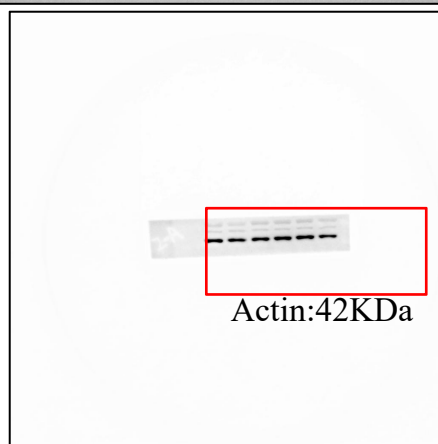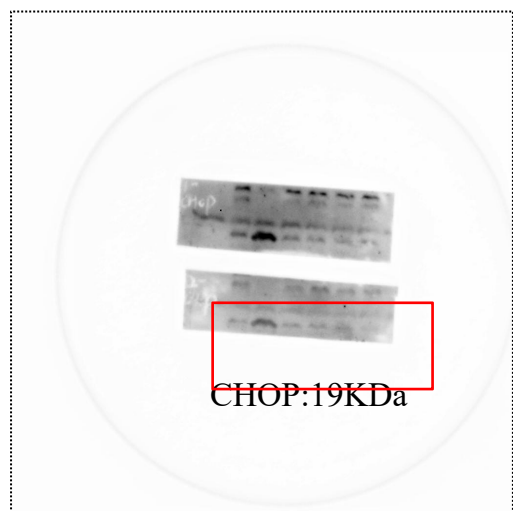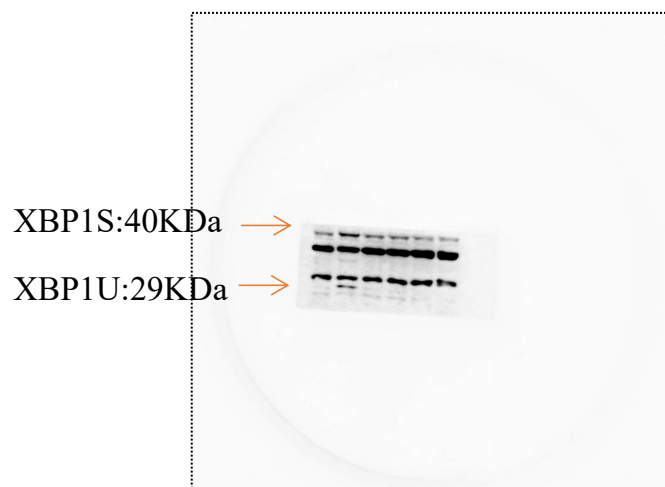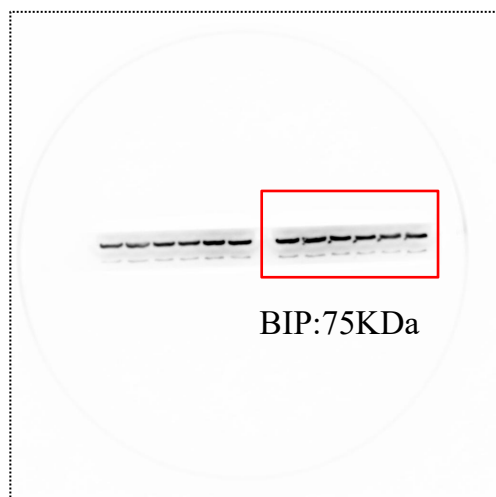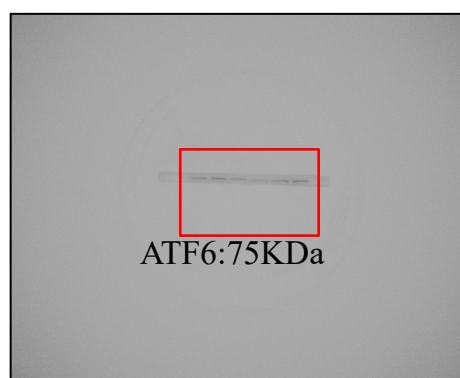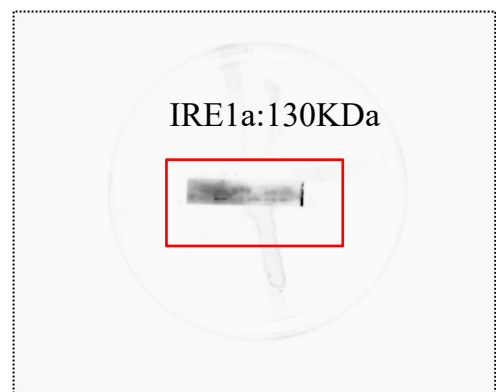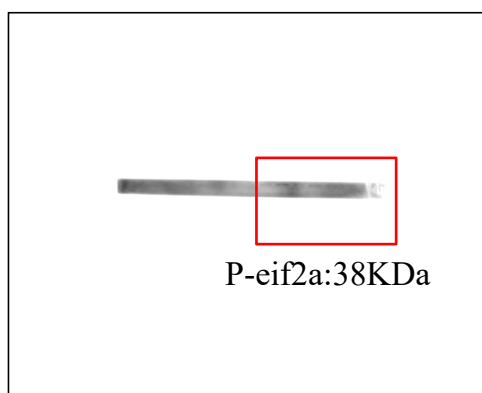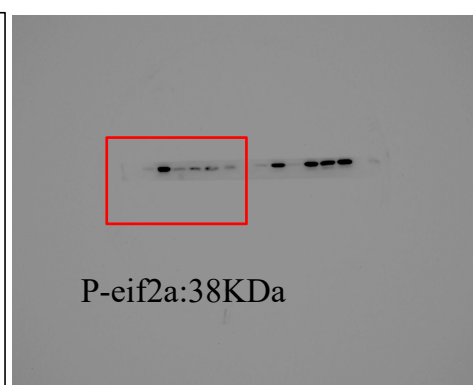

Supplement: DataSheet_1.pdf [file DataSheet_1.pdf]
